# Supplementary material for: Highly-branched mesoporous Au–Pd–Pt trimetallic nanoflowers blooming on reduced graphene oxide as an oxygen reduction electrocatalyst
Source: Royal Society of Chemistry journal article supplement (doi:10.1039/c6cc03073d), 2016-01-01
Supplement: c6cc03073d1.pdf [file c6cc03073d1.pdf]

## Electronic Supplementary Information

# Highly-branched mesoporous Au-Pd-Pt trimetallic nanoflowers blooming on reduced graphene oxide as oxygen reduction electrocatalyst

## Experimental Details

**Chemicals:** Potassium tetrachloroplatinate ( $K_2PtCl_4$ , >99.9%), sodium chloropalladite ( $Na_2PdCl_4$ , 98%), Pluronic F127 ( $M_w=12600$ ), hexadecylpyridinium chloride monohydrate (HDPC, 98%), Pluronic P123 ( $M_w=5750$ ) and Brij 58 ( $M_w=1124$ ) were purchased from Aladdin Co. Gold chloride ( $HAuCl_4$ , 99%) and L-ascorbic acid (AA, AR) were purchased from Sinopharm Chemical Reagent Co. Ltd. (Shanghai, China). Commercial Pt/C catalyst was ordered from Alfa Aesar Co. All the chemicals were used as received without further purification. The water used in all experiments was ultrapure (Millipore, 18.2  $\Omega M$ ).

**Synthesis of Au-Pd-Pt NFs/rGO:** In a typical synthesis of highly-branched mesoporous Au-Pd-Pt NFs/rGO, Pluronic F127 (14 mg) and HDPC (1 mg) dissolved in 5 mL  $H_2O$  to form a homogeneous solution, then  $HAuCl_4$  (20 mM, 0.1 mL),  $Na_2PdCl_4$  (20 mM, 0.4 mL) and  $K_2PtCl_4$  (20 mM, 0.4 mL) were successively added into the vial, followed by AA (100mM, 0.9 mL). The mixture solution was stirred for 1 h at room temperature. Then freshly prepared rGO (3 mg in 1 mL aqueous solution obtained by hydrazine reduction of graphene oxide synthesized by modified Hummers method<sup>1,2</sup>) was added and kept stirring for another 1 h. The resulting colloidal products were collected by centrifugation at 8000 rpm for 10 min and washed three times with water.

**Characterization:** The particle morphology and composition were investigated using a Hitachi H-8100 EM transmission electron microscope (TEM) with an accelerating voltage of 100 kV. HRTEM images and HAADF-STEM images were obtained with a

JEM-2010 operating at 200 kV equipped with an energy dispersive spectrometer (EDS). X-ray diffraction (XRD) patterns were collected on D8 ADVANCE (Bruker AXS, Germany) diffractometer equipped with Cu K $\alpha$  radiation. The mole ratio of nanoparticles was determined by the inductively coupled plasma atomic emission spectrophotometry (ICP-AES), which obtained by a Thermo Scientific iCAP6300 (Thermo Fisher Scientific, US). X-ray photoelectron spectroscopy (XPS) measurement was performed on an ESCALAB-MKII spectrometer (VG Co., United Kingdom) with Al K $\alpha$  X-ray radiation as the X-ray source for excitation. The nitrogen physisorption isotherms were measured on a Quantachrome Autosorb 3.01 instrument, and samples were degassed for 24 h at 50 °C under vacuum before the measurements. Thermogravimetric analysis (TGA) were performed from room temperature to 800 °C under N<sub>2</sub> atmosphere.

**Electrochemical Measurements:** A conventional three-electrode cell was used to perform the electrochemical measurements. Ag/AgCl (saturated KCl) electrode served as reference electrode, Pt wire served as counter electrode, and a working electrode. The working electrode was a glassy-carbon Rotating Ring Disk Electrode (RDE). To prepare the working electrode, the different catalysts were mixed with ethanol, water, and Nafion (5%) (v: v : v=1 : 1 : 0.075) and sonicated for 10 min. Then 10  $\mu$ g of the catalyst was cast on a RDE and dried under ambient condition. The electrochemical active surface area (ECSA) measurement was determined by integrating the hydrogen adsorption charge on the CV at room temperature in 0.1 M N<sub>2</sub>-saturated HClO<sub>4</sub> solution. The potential scan rate was 50 mV s<sup>-1</sup> for the CV measurement. ORR measurements were conducted in a 0.1 M HClO<sub>4</sub> solution purged with oxygen during the measurement. The scan rate and rotation rate for ORR measurement were 10 mV s<sup>-1</sup> and 1600 rpm, respectively. The accelerated durability tests were performed at room temperature in O<sub>2</sub>-saturated 0.1 M HClO<sub>4</sub> solutions by applying the cyclic potential sweeps between 0.6 and 1.1 V versus RHE at a sweep rate of 50 mV s<sup>-1</sup> for 6000 cycles.

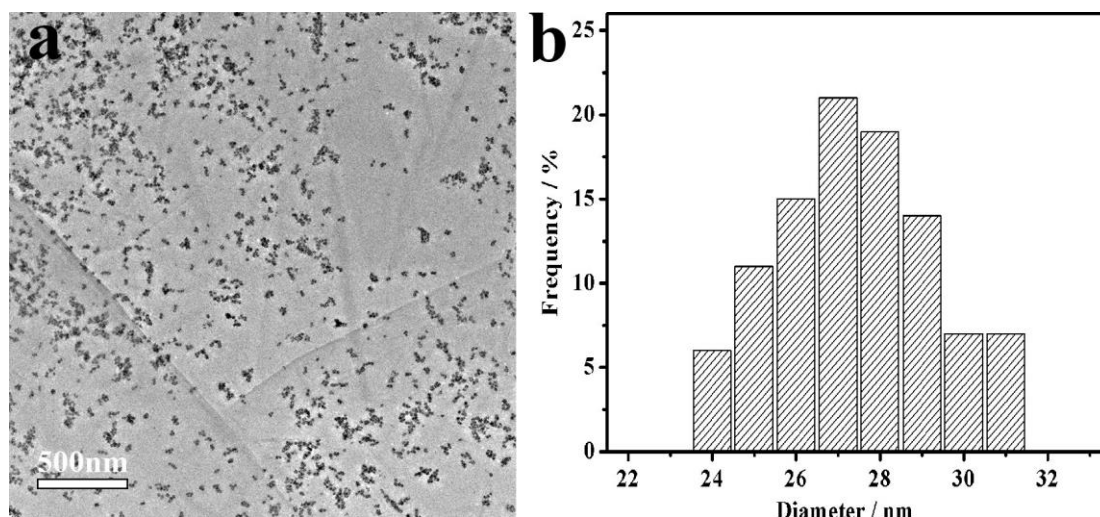

**Fig. S1** (a) Additional TEM image and (b) the size distribution of the Au-Pd-Pt NFs/rGO.

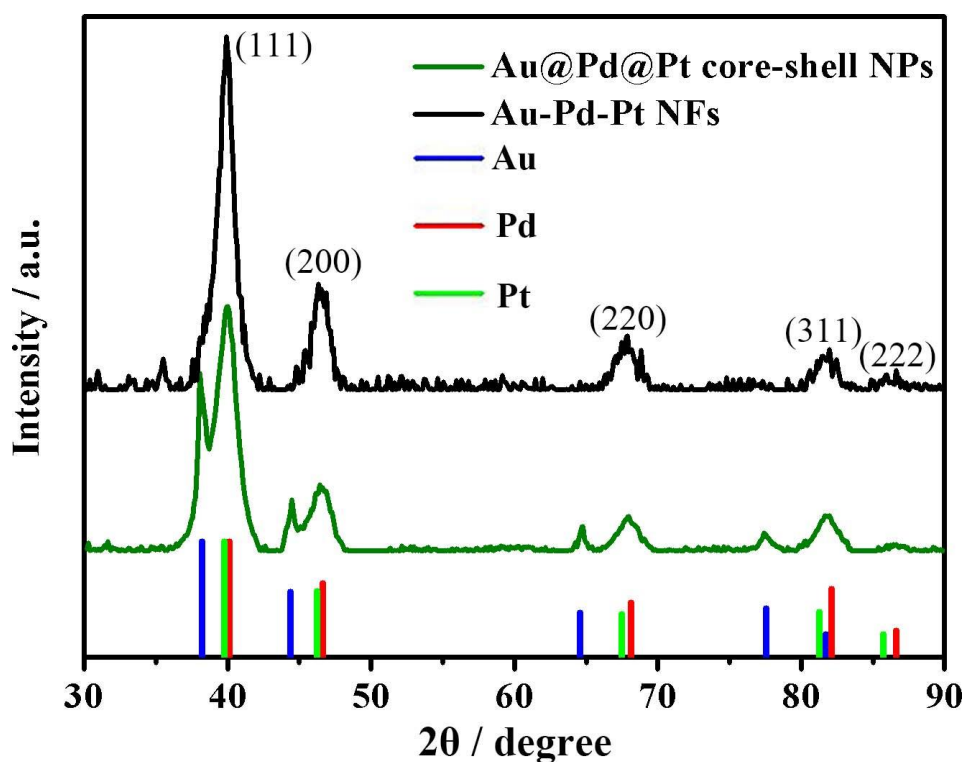

**Fig. S2** Wide-angle XRD patterns of the typically prepared Au@Pd@Pt core-shell nanoparticles (corresponding to Fig. S5) and Au-Pd-Pt NFs.

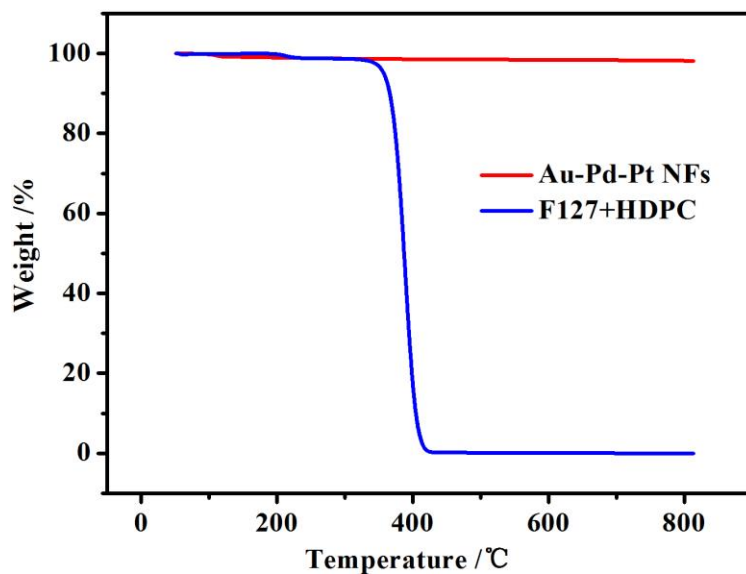

**Fig. S3** TGA of the Au-Pd-Pt NFs and two surfactants compound performed from room temperature to 800 °C under N<sub>2</sub> atmosphere.

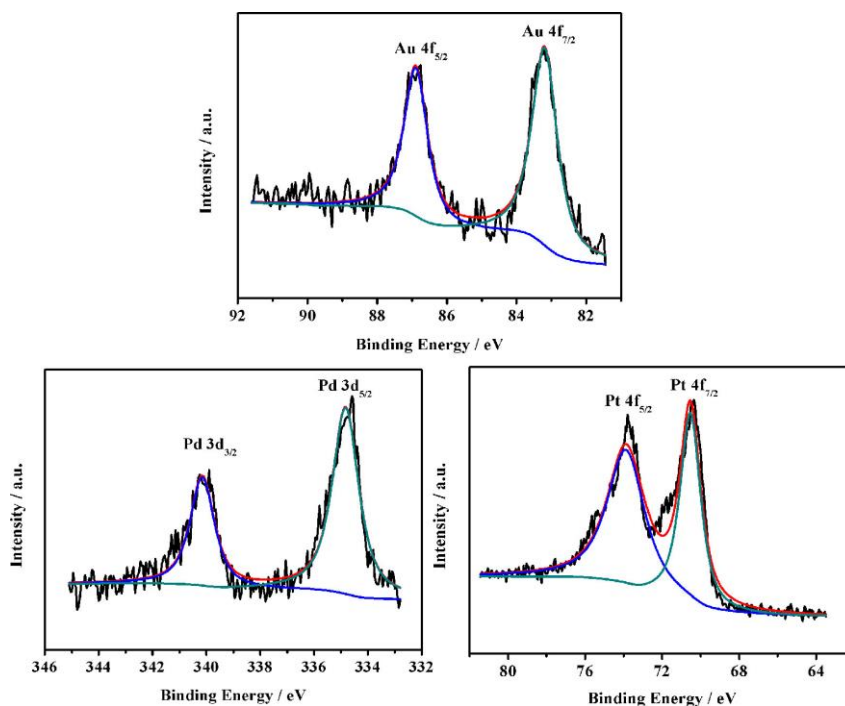

**Fig. S4** XPS spectra for the Au 4f region (Au 4f<sub>7/2</sub> and Au 4f<sub>5/2</sub>), Pd 3d region (Pd 3d<sub>5/2</sub> and Pd 3d<sub>3/2</sub>) and Pt 4f region (Pt 4f<sub>7/2</sub> and Pt 4f<sub>5/2</sub>) for the Au-Pd-Pt NFs.

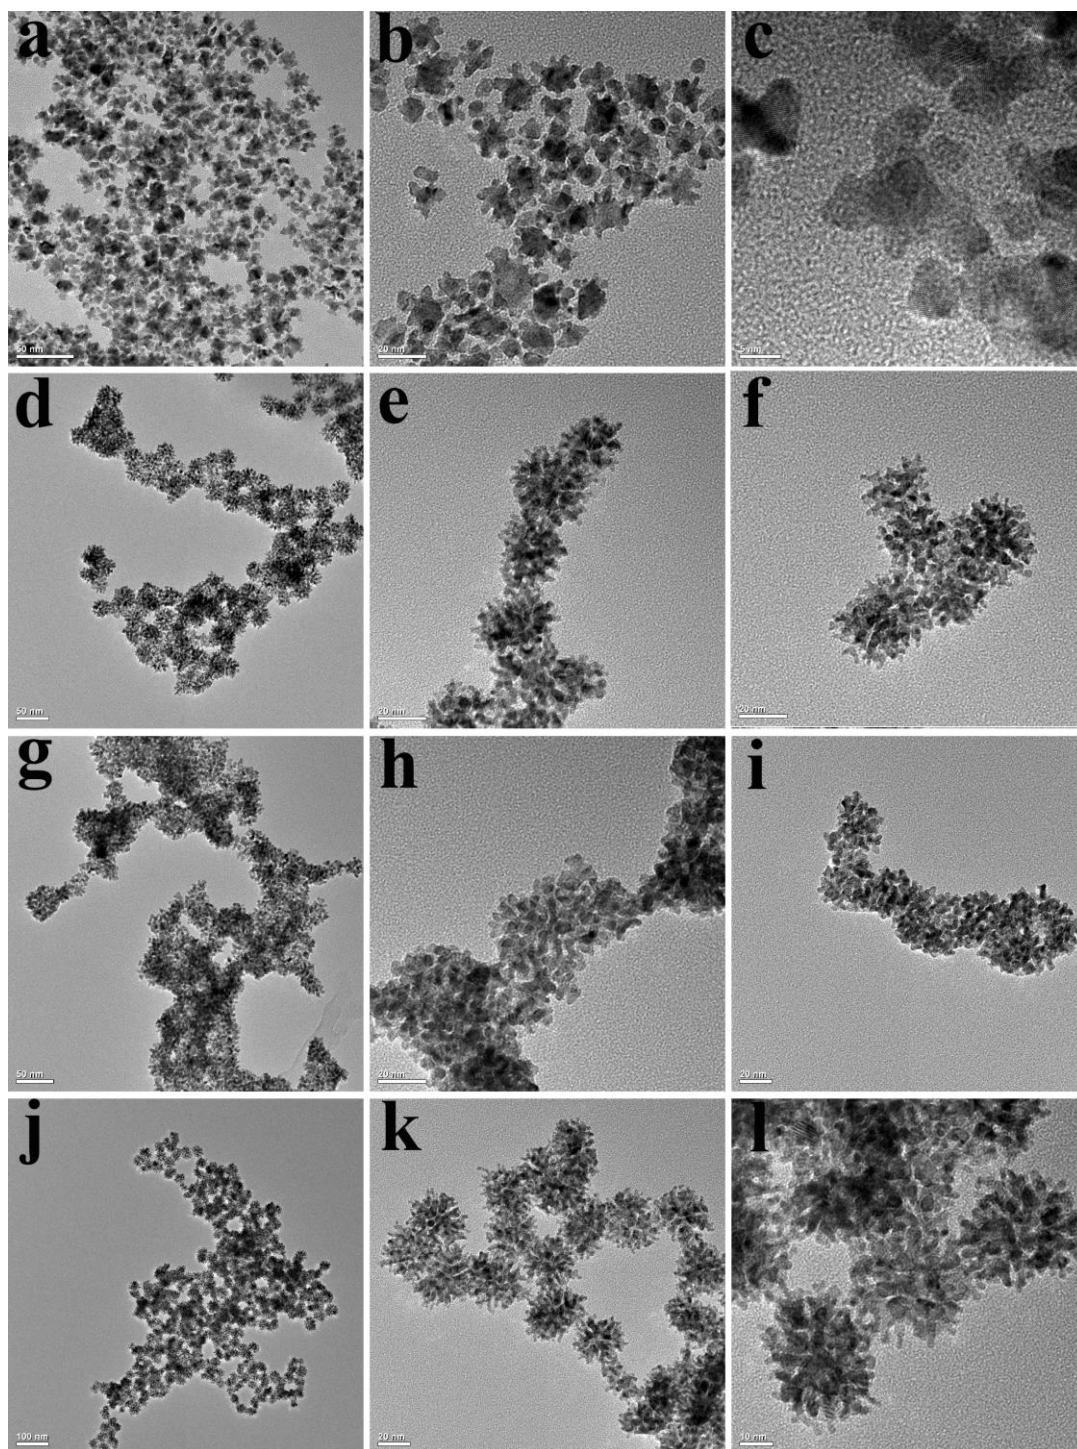

**Fig. S5** TEM images of the trimetallic nanocrystals prepared under the same conditions but change the mole ratio of Au: Pd: Pt into (a, b, c) 1: 1: 1, (d, e, f) 1: 2: 4, (g, h, i) 1: 4: 2 and (j, k, l) 1: 4: 6.



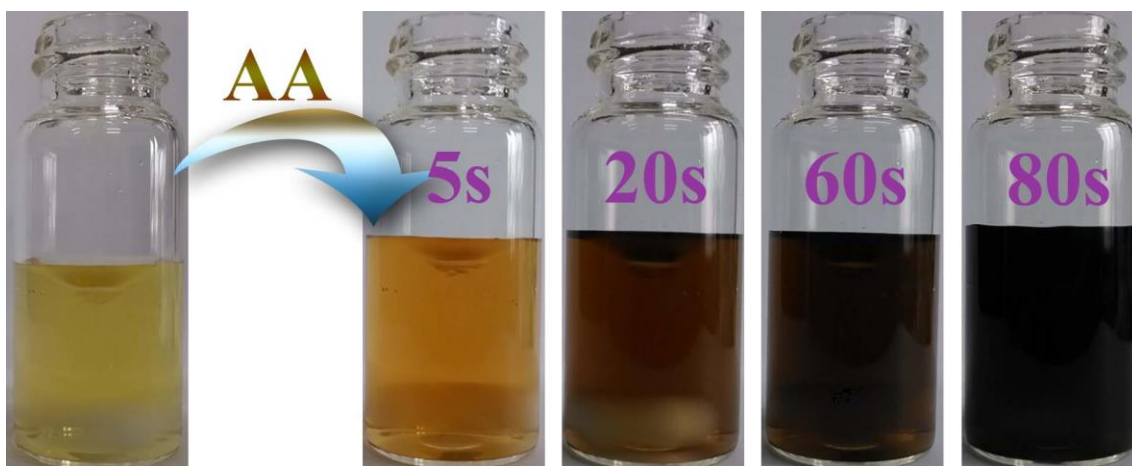

**Fig. S6** Photographs of reaction solution reacted under different reaction times.

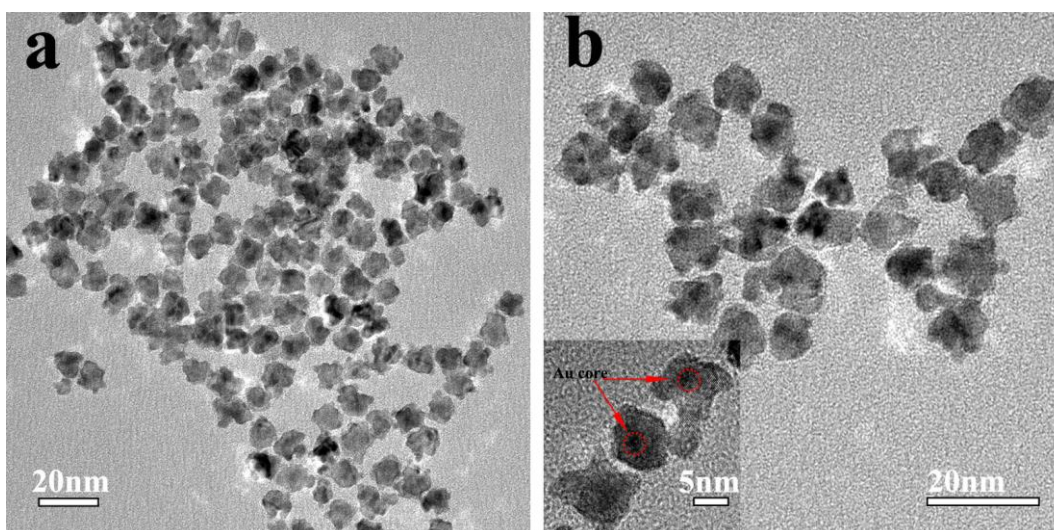

**Fig. S7** TEM images of the products prepared under the same conditions as the synthesis of Au-Pd-Pt nanocrystals but in the absence of HDPC.

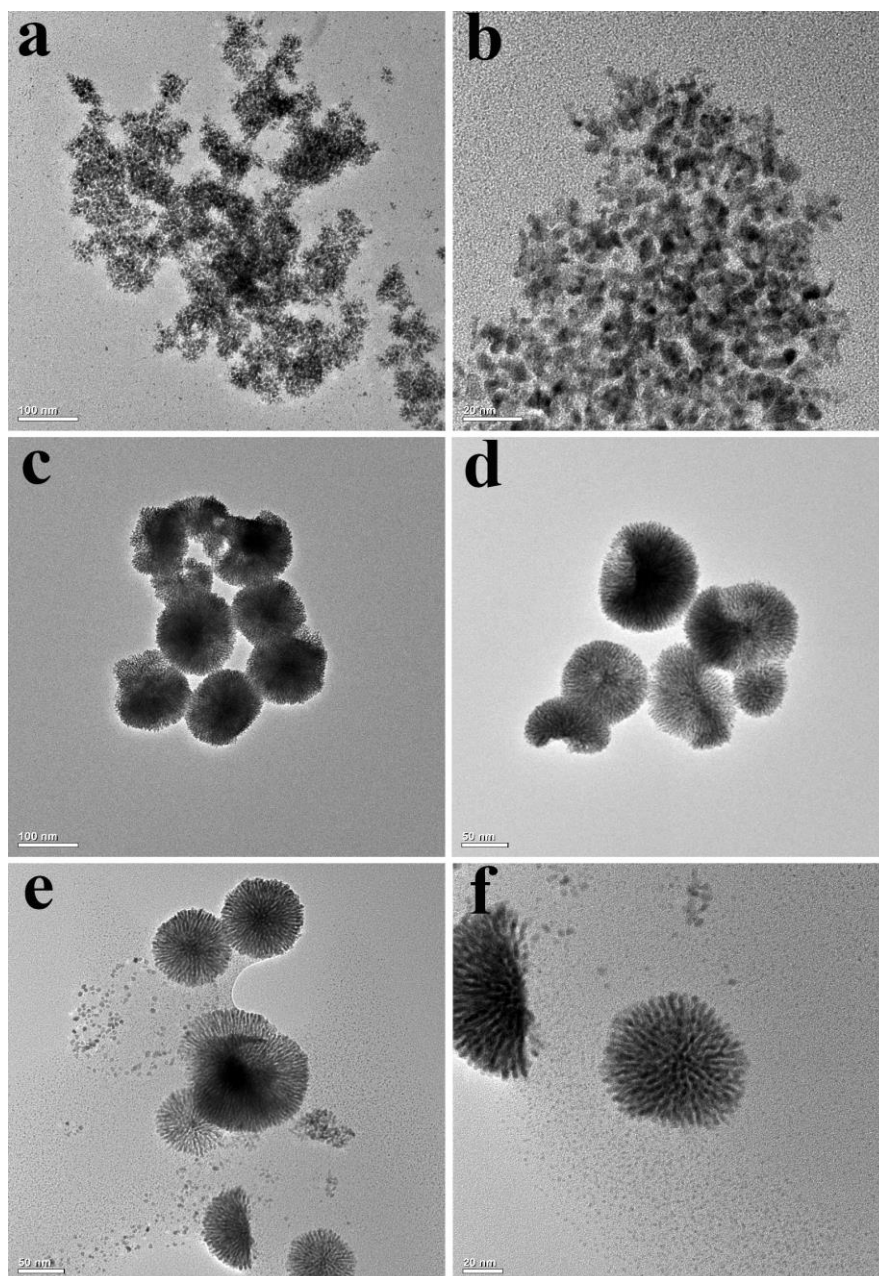

**Fig. S8** TEM images of the products prepared under the same conditions as the synthesis of Au-Pd-Pt nanocrystals but with different amount of Pluronic F127 and HDPC: (a, b) 15 mg, 3mg, (c, d) 0 mg, 1mg and (e, f) 0 mg, 10 mg.

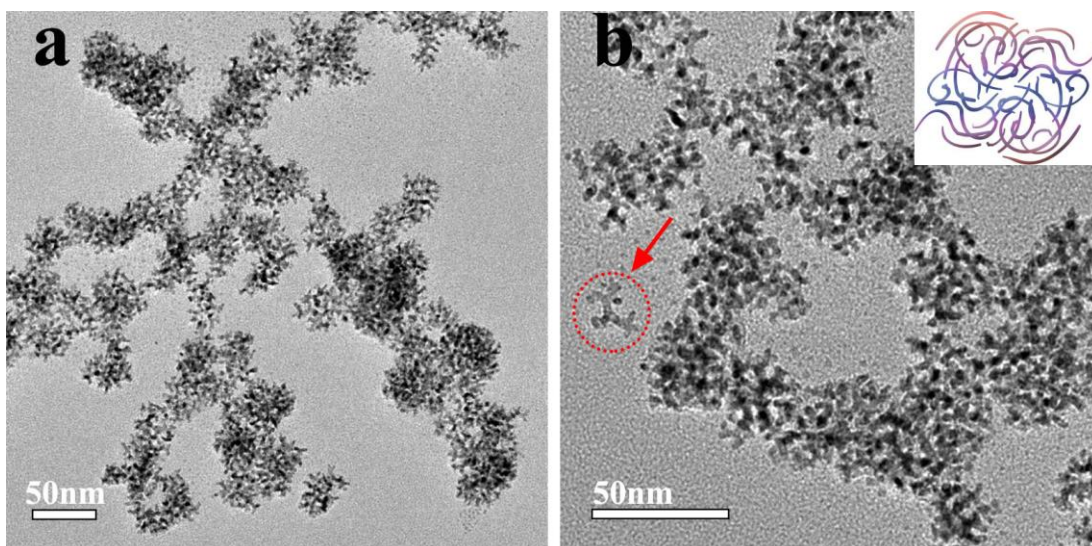

**Fig. S9** TEM images of the products prepared under the same conditions as the synthesis of Au-Pd-Pt nanocrystals but in the absence of  $\text{HAuCl}_4$ .

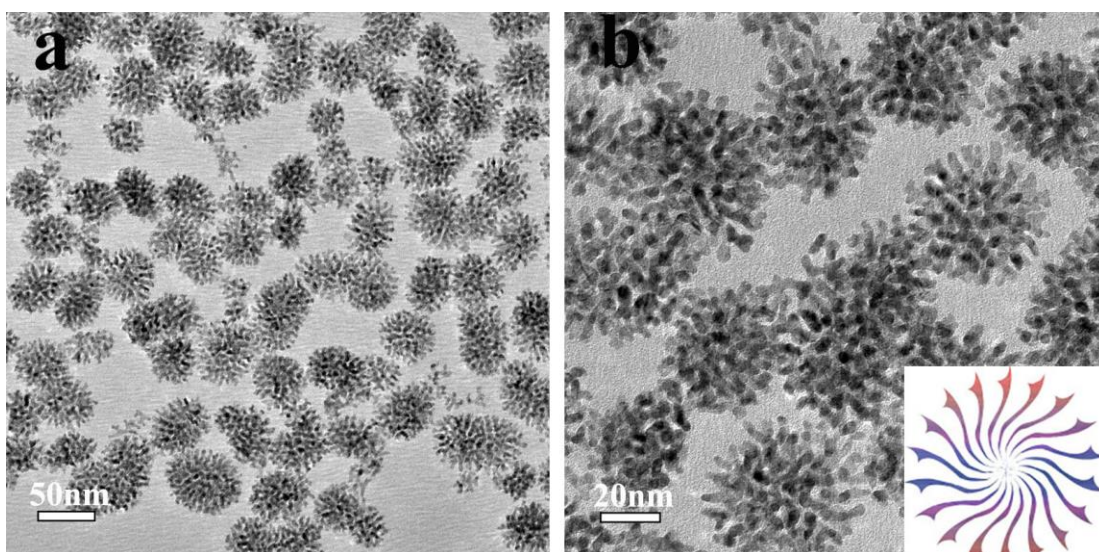

**Fig. S10** TEM images of the products prepared under the same conditions as the synthesis of Au-Pd-Pt nanocrystals but replaced the Pluronic F127 with Pluronic P123.



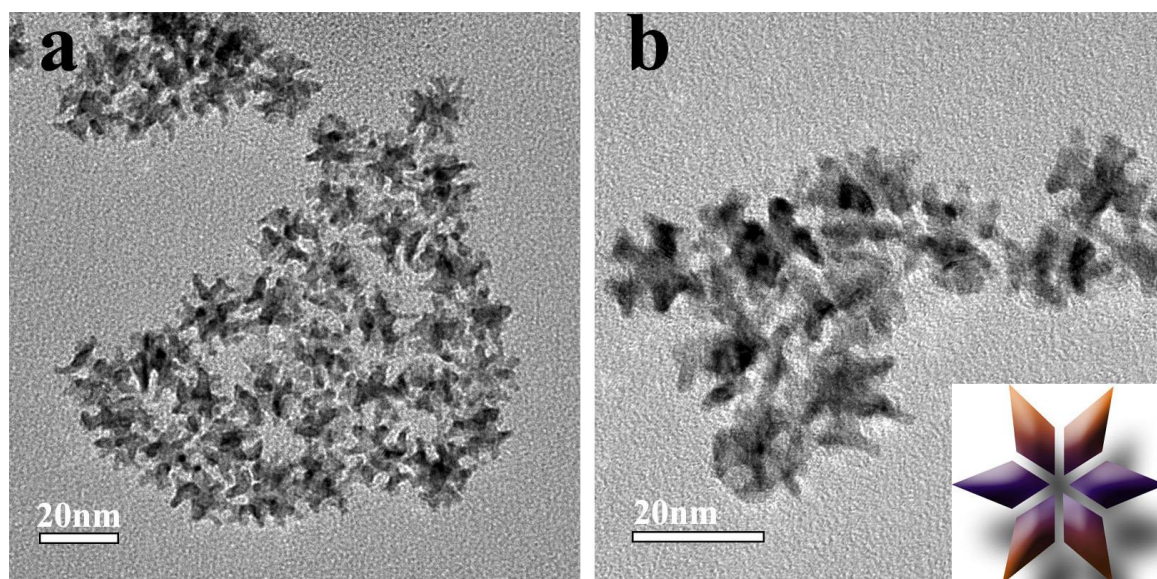

**Fig. S11** TEM images of the products prepared under the same conditions as the synthesis of Au-Pd-Pt nanocrystals but replaced the Pluronic F127 with Brij 58.

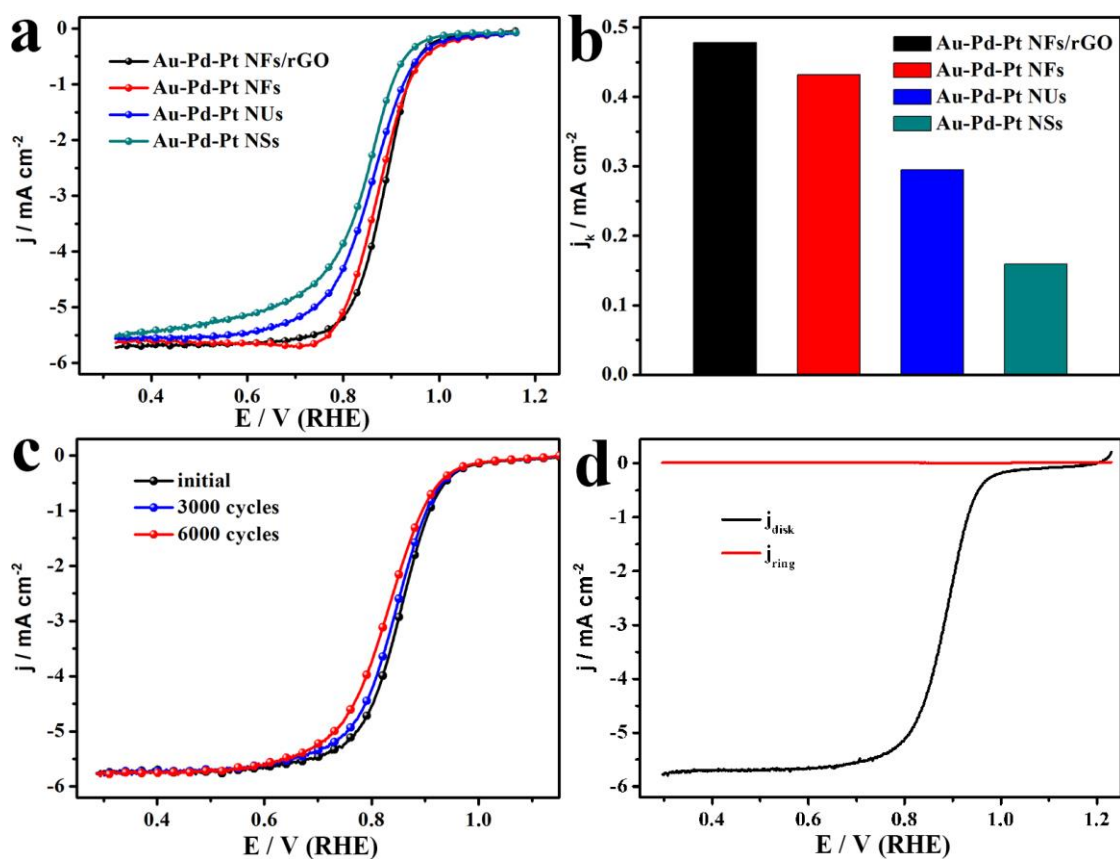

**Fig. S12** (a) ORR polarization curves and (b) the histogram of the kinetic current for the Au-Pd-Pt NFs/rGO, Au-Pd-Pt NFs, Au-Pd-Pt NUs (corresponding to Fig. S10) and Au-Pd-Pt NSs (corresponding to Fig. S11). (c) ORR polarization curves for the Pt/C catalyst after prolonged cycles of CV. (d) RRDE voltammograms of the Au-Pd-Pt NFs/rGO in an O<sub>2</sub>-saturated 0.1 M HClO<sub>4</sub> aqueous solution with a sweep rate of 10 mV s<sup>-1</sup> and a rotation rate of 1600 rpm.

The electron transfer number calculate from rotating ring-disk electrode (RRDE) measurement:

$$n = 4 \times \frac{I_d}{I_d + I_r / N}$$

Where  $I_d$  is disk current,  $I_r$  is ring current and  $N$  is current collection efficiency ( $N$ ) of the Pt ring.  $N$  was determined to be 0.44 from the reduction of  $K_3Fe[CN]_6$ .

## References

- 1 W. S. Hummers, R. E. Offeman, *J. Am. Chem. Soc.*, 1958, **80**, 1339.
- 2 S. Stankovich, D. A. Dikin, R. D. Piner, K. A. Kohlhaas, A. Kleinhammes, Y. Jia, Y. Wu, S. T. Nguyen, R. S. Ruoff, *Carbon*, 2007, **45**, 1558.
